# Supplementary material
Source: ML conference proceedings conference paper supplement (https://openreview.net/forum?id=-kS21GWVJU)
Supplement: supplementary_material [file attachment]

**Code link:** <https://github.com/FFY0/meta-sketch>

**Data set link:**

Word-query: [https://jeffhuang.com/search\\_query\\_logs.html](https://jeffhuang.com/search_query_logs.html)

IP-trace: <https://github.com/Grace-TL/MV-Sketch>
