# Supplementary material
Source: ML conference proceedings conference paper supplement (https://openreview.net/forum?id=-kS21GWVJU)
Supplement: supplementary_material [file attachment]

## 499 A supplemental material

### 500 A.1 Details of Meta-sketch Operations

501 Algorithm 3 describes details about operations of the meta-sketch, including broadcast, dimensions  
 502 conversion processes, and three forms of  $\ominus$ . It is important to emphasize that all the operations are  
 503 performed on one stream item, so that a parallelized version can easily be implemented by adding an  
 504 additional dimension.

---

**Algorithm 3:** Details of Meta-sketch Operations

---

```

1 Operation Store( $e_i, M$ ):
2    $z_i, r_i \leftarrow \mathcal{F}_E(e_i); a_i \leftarrow \mathcal{F}_{Sa}(r_i);$ 
3    $a_i \leftarrow \text{changeShape}(a_i, \mathbb{R}^{d_1 \times d_2}, \mathbb{R}^{d_1 \times 1 \times d_2})$ 
4    $z_i \leftarrow \text{changeShape}(z_i, \mathbb{R}^{l_z}, \mathbb{R}^{d_1 \times l_z \times 1})$ 
5    $M \leftarrow M + z_i a_i;$ 
6 Operation Delete( $e_i, M$ ):
7    $z_i, r_i \leftarrow \mathcal{F}_E(e_i); a_i \leftarrow \mathcal{F}_{Sa}(r_i);$ 
8    $a_i \leftarrow \text{changeShape}(a_i, \mathbb{R}^{d_1 \times d_2}, \mathbb{R}^{d_1 \times 1 \times d_2})$ 
9    $z_i \leftarrow \text{changeShape}(z_i, \mathbb{R}^{l_z}, \mathbb{R}^{d_1 \times l_z \times 1})$ 
10   $M \leftarrow M - z_i a_i;$ 
11 Operation Query( $x_i, M, N$ ):
12   $z_i, r_i \leftarrow \mathcal{F}_E(x_i); a_i \leftarrow \mathcal{F}_{Sa}(r_i);$ 
13   $\hat{f}_i \leftarrow \mathcal{F}_{dec}(\{M \ominus a_i\}, z_i, N);$ 
14  return  $\hat{f}_i;$ 
15 Module Embedding( $x_i$ ):
16   $z_i \leftarrow g_{emb}(e_i); r_i \leftarrow g_{add}(z_i);$ 
17  return  $z_i, r_i$ 
18 Module SparseAddress( $r_i$ ):
19   $r_i \leftarrow \text{changeShape}(r_i, \mathbb{R}^{l_r}, \mathbb{R}^{d_1 \times 1 \times l_r});$ 
20   $\hat{a}_i \leftarrow r_i A;$ 
21   $\hat{a}_i \leftarrow \text{changeShape}(\hat{a}_i, \mathbb{R}^{d_1 \times 1 \times d_2}, \mathbb{R}^{d_1 \times d_2});$ 
22   $a_i \leftarrow \text{SparseMax}(\hat{a}_i, \text{dim} = -1)$ 
23  return  $a_i$ 
24 Module Decoding( $\{M \ominus a_i\}, z_i, N$ ):
25   $m_i \leftarrow \text{basicRead}(M, a_i)$ 
26   $i_1, i_2 \leftarrow \text{advancedRead}(m_i, z_i)$ 
27   $\text{info} \leftarrow \text{concatenate}(m_i.\text{flatten}(), i_1.i_2, N)$ 
28   $\hat{f} \leftarrow g_{dec}(\text{info})$ 
29  return  $\hat{f}$ 
30 Function changeShape( $\text{vector}, \mathbb{R}^n, \mathbb{R}^m$ ):
31  change vector's shape from  $\mathbb{R}^n$  to  $\mathbb{R}^m$ 
32  return vector
33 Function basicRead( $M, a_i$ ):
34   $a_i \leftarrow \text{changeShape}(a_i, \mathbb{R}^{d_1 \times d_2}, \mathbb{R}^{d_1 \times d_2 \times 1})$ 
35   $m_i \leftarrow M a_i$ 
36   $m_i \leftarrow \text{changeShape}(m_i, \mathbb{R}^{d_1 \times l_z \times 1}, \mathbb{R}^{d_1 \times l_z})$ 
37  return  $m_i$ 
38 Function advancedRead( $m_i, z_i$ ):
39   $z_i \leftarrow \text{changeShape}(z_i, \mathbb{R}^{l_z}, \mathbb{R}^{d_1 \times l_z})$ 
40   $i_1 \leftarrow m_i.\text{min}(\text{dim} = -1)$ 
41   $z_i^1 \leftarrow \text{where}(z_i > \epsilon, z_i, \epsilon)$ 
42   $z_i^2 \leftarrow \text{where}(z_i < \epsilon, \text{MAX}, 0)$ 
43   $i_2 = [(m_i + z_i^2)/z_i^1].\text{min}(\text{dim} = -1)$ 
44  return  $i_1, i_2$ 

```

---

## 505 A.2 Details of meta-task generation

506 The detailed algorithms for generating basic/adaptive meta-tasks are shown in Algorithm 4 and  
507 Algorithm 5 respectively.

---

### Algorithm 4: Generating a Basic Meta-task

---

**Data:** Item pool  $I$ ; Distribution pool  $P$ ; Frequency mean range  $L$ ;

**Result:** a meta-task  $t_i$ ;

```

1 Sample an item size  $n_i$  from  $[1, |I|]$ ;
2 Sample a frequency mean  $\bar{f}$  from  $L$ ;
3 Sample a subset  $\{x_1^{(i)}, \dots, x_{n_i}^{(i)}\}$  of  $I$  with size  $n_i$ ;
4 Sample a instance  $p^{(i)} \sim P$ ;
5 for  $x_j^{(i)} \in \{x_1^{(i)}, \dots, x_{n_i}^{(i)}\}$  do
6   Sample  $p_j^{(i)} \sim p^{(i)}$  and  $f_j^{(i)} \leftarrow \lceil n_i \times \bar{f} \times p_j^{(i)} \rceil$ ;
7   add  $x_j^{(i)}$  to the  $t_i$ 's store set ( $s_i$ ) with  $f_j^{(i)}$  times;
8   add  $(x_j^{(i)}, f_j^{(i)})$  to  $t_i$ 's query set ( $q_i$ );
9 end
```

---



---

### Algorithm 5: Generating an Adaptive Meta-task

---

**Data:** Item pool  $I$ ; Real frequency distribution  $p$ ; Frequency mean range  $L$ ;

**Result:** a meta-task  $t_i$ ;

```

1 Sample an item size  $n_i$  from  $[1, |I|]$ ;
2 Sample a frequency mean  $\bar{f}$  from  $L$ ;
3 Sample a subset  $\{x_1^{(i)}, \dots, x_{n_i}^{(i)}\}$  of  $I$  with size  $n_i$ ;
4 for  $x_j^{(i)} \in \{x_1^{(i)}, \dots, x_{n_i}^{(i)}\}$  do
5   Sample  $p_j \sim p$  and  $f_j^{(i)} \leftarrow \lceil n_i \times \bar{f} \times p_j \rceil$ ; // The correspondence between items and
   frequencies is changed.
6   add  $x_j^{(i)}$  to the  $t_i$ 's store set ( $s_i$ ) with  $f_j^{(i)}$  times;
7   add  $(x_j^{(i)}, f_j^{(i)})$  to  $t_i$ 's query set ( $q_i$ );
8 end
```

---

## 508 A.3 Hyper-Parameters

509 We did not deliberately tune the parameters of the meta-sketch. We just followed the setting about  
510 conventional NN to choose parameters by balancing the sketching ability and training efficiency.  
511 Table 4 shows all hyper-parameters that are considered (best parameters are bolded).

| Table 4: Hyper-parameters Considered |                                           |
|--------------------------------------|-------------------------------------------|
| Learning rate of MS                  | $\{1e-3, 5e-4, \mathbf{1e-4}, 5e-5\}$     |
| Hidden Size of $g_{emb}$             | $\{64, \mathbf{128}, 256\}$               |
| Hidden Size of $g_{add}$             | $\{24, \mathbf{48}, 64, 64\}$             |
| Hidden Size of $g_{dec}$             | $\{128, \mathbf{256}, 512\}$              |
| $d_2 : l_r$                          | $\{5 : 1, \mathbf{5} : 2, 5 : 4, 5 : 6\}$ |
| $d_1$                                | $\{1, \mathbf{2}, 3\}$                    |

## 512 A.4 Ablation Study

513 As shown in Figure 11 we conduct ablation studies to evaluate some key techniques of the meta-  
514 sketch. In all comparisons, the settings follow Section 4 ( $n = 5K, B = 9KB$ , Word-query), as shown  
515 in Table 5. The comparison between Base and Abl 1 shows the effectiveness of the optimizations on  
516 operation  $\ominus$ . The comparison between Base and Abl 2 shows improvement with the address network,  
517 especially for the later stages of meta-sketch training. It should be emphasized that embedding vector

will pass a *Relu* activation before the output of the  $g_{emb}$ , which allows the model to control the sparsity of embedding vectors easily. In the comparison between Base and Abl 3, we can see the effectiveness of the *Relu*.

Table 5: Settings for the Ablation Study

|             | Base | Abl1 | Abl2 | Abl3 |
|-------------|------|------|------|------|
| $\ominus$   | yes  | no   | yes  | yes  |
| $g_{add}$   | yes  | yes  | no   | yes  |
| <i>Relu</i> | yes  | yes  | yes  | no   |

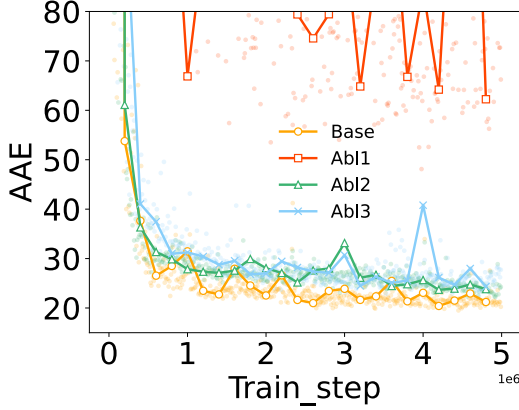

Figure 11: Ablation Study

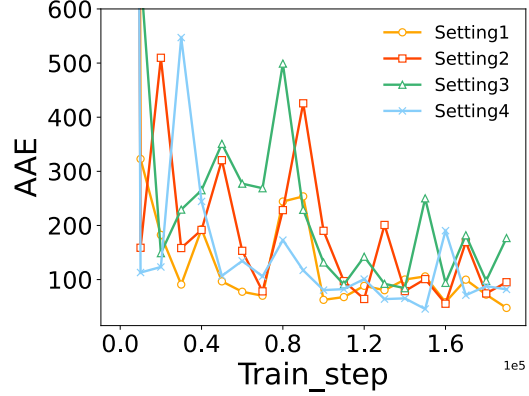

Figure 12: AAE w.r.t. Different Settings of  $M$

#### A.5 The Default Settings and Discussion for $M(A)$

The default parameters of  $M(A)$  under different budgets are shown in Table 6. Note that we first set the size of  $M$ , and then obtain the size of the compressed  $A$  according to the ratio of  $l_z : l_r \approx 5 : 1$ .

We further discuss the effect of the setting for  $M$ . Figure 12 shows the effect of different settings in Table 7 on the training of the meta-sketch under a fixed 9KB budget. All competitors follow the same training setting ( $n = 5K, B = 9KB$ , Word-query). For  $d_1$ , we set it in the range of 1 to 2, similar to the setting of the number of hash functions in traditional sketches. Figure 12 shows that when  $d_1 = 2$ , the model yields a better result. For the settings of  $d_2$  and  $l_z$ , it shows that the model yields a better result when the ratio of  $d_2/l_z$  is around 2. Thus, we set the default parameters for our experiments under the premise of  $d_1 = 2$ , and  $d_2/l_z \approx 2$ .

In addition, we can see an inappropriate setting may harm the stability in the early training phase, leading to non-convergence. For example, we can observe that with an additional dimension  $M$  corresponds to the better training stability, in the comparison between settings 1 and 4. The comparison of setting 1, setting 2, and setting 3 also shows a reasonable large  $l_z$  is beneficial to the stability of the meta-sketch.

Table 6: Default Size of  $M(A)$  for Different Space Budgets

| $B$   | 5KB | 7KB | 9KB | 11KB | 13KB | 15KB | 17KB |
|-------|-----|-----|-----|------|------|------|------|
| $d_1$ | 2   | 2   | 2   | 2    | 2    | 2    | 2    |
| $d_2$ | 40  | 45  | 50  | 61   | 61   | 64   | 70   |
| $l_z$ | 16  | 20  | 23  | 23   | 27   | 30   | 31   |
| $l_r$ | 4   | 4   | 5   | 5    | 5    | 6    | 6    |

Table 7: Settings of  $M$

| Setting | 1  | 2   | 3   | 4  |
|---------|----|-----|-----|----|
| $d_1$   | 2  | 2   | 2   | 1  |
| $l_z$   | 23 | 12  | 6   | 34 |
| $d_2$   | 50 | 100 | 200 | 68 |

#### A.6 The Parameters of Skewed Distributions

Table 8 shows the parameter settings of the three distributions in Section 5 with different skewness levels. Here, the level of skewness is a relative concept under each type of distribution. We can

convert all distributions to a zipf form, i.e. sorting  $n$  items on a descending order of  $\frac{f}{N}$ . Afterwards, the level of skewness can be measured by the slope from the first to last positions of the ordering.

Table 8: The Parameters of Skewed Distributions

|            | Level1         | Level2           | Level3           | Level4           |
|------------|----------------|------------------|------------------|------------------|
| Zipf       | $\alpha = 1.0$ | $\alpha = 0.8$   | $\alpha = 0.6$   | $\alpha = 0.4$   |
| Triangular | $k = -1/128$   | $k = -1/64$      | $k = -1/32$      | $k = -1/16$      |
| Uniform    | $a=0, b=10000$ | $a=1250, b=8750$ | $a=2500, b=7500$ | $a=3750, b=6250$ |

## A.7 Latency and Throughput of Meta-sketch

We evaluate the write/query latency and throughput of the meta-sketch and the CM-sketch<sup>4</sup> under the same setting. We use a single write/query operation for the testing of the latency and a batch of 10K write/query operations for the testing of the throughput. As shown in Table 9 the latency of write/query operations of the meta-sketch is slightly higher than that of the CM-sketch. But with the parallel algebraic operations of NNs, meta-sketch can have a significantly higher throughput, e.g., in GPU environment. For example, the writing throughput of meta-sketch is around 30/1400 times higher than that of the CM-sketch when deployed on CPU/GPU. Similar observations are drawn on query operations.

Table 9: Latency and Throughput of Meta-sketch

| Device      | Write Latency |        | Query Latency |        | Write Throughput(QPS) |          | Query ThroughPut(QPS) |          |
|-------------|---------------|--------|---------------|--------|-----------------------|----------|-----------------------|----------|
|             | CPU           | GPU    | CPU           | GPU    | CPU                   | GPU      | CPU                   | GPU      |
| Meta-sketch | 0.80ms        | 1.32ms | 1.57ms        | 2.25ms | 166.69k               | 7142.86k | 135.14k               | 4063.39k |
| CM-sketch   | 0.27ms        | -      | 0.25ms        | -      | 4.80k                 | -        | 4.86k                 | -        |

## A.8 Supplementary Experiments

Figure 13 and 14 show the AAEs of different competitors in the experiments of Section 4.2 under different space budgets ( $B$ ) and different item sizes ( $n$ ), respectively.

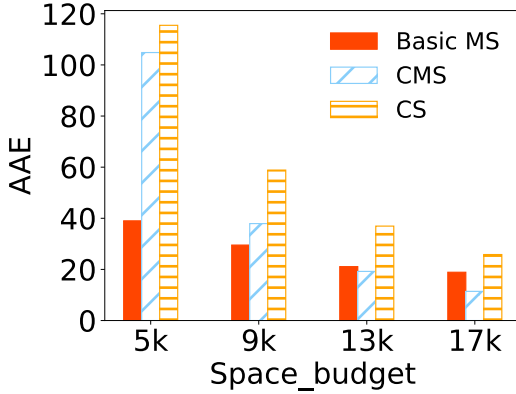

Figure 13: AAE w.r.t.  $B$

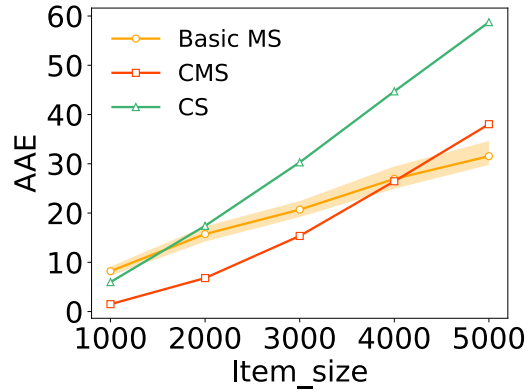

Figure 14: AAE w.r.t.  $n$

## A.9 Codes for Meta-sketch

We upload the source code to github: <https://github.com/FFY0/meta-sketch>.

<sup>4</sup>The implementation of the CM-sketch is from package pyprobables, which is a definitive python library for probabilistic data structures (<https://pyprobables.readthedocs.io/en/latest/code.html>).
